# Supplementary figures and images for: Influence of the luxR Regulatory Gene Dosage and Expression Level on the Sensitivity of the Whole-Cell Biosensor to Acyl-Homoserine Lactone
Source: MDPI journal article supplement (doi:10.3390/bios11060166), 2021-05-23

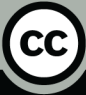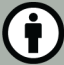

BY

Supplement: s1 [file s1]

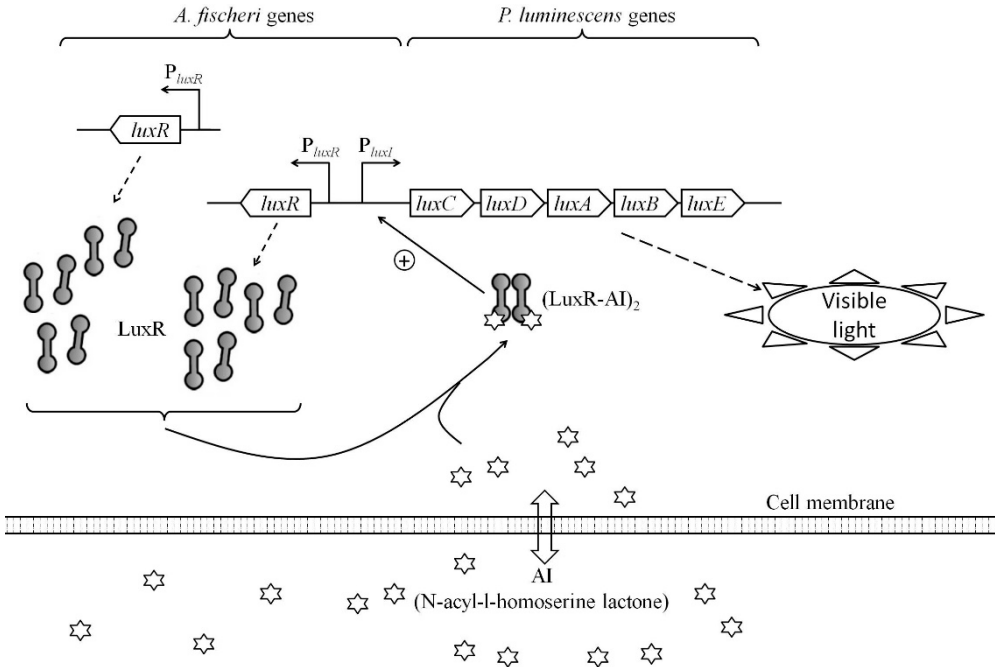

Supplement: s1 [file s1]

**A**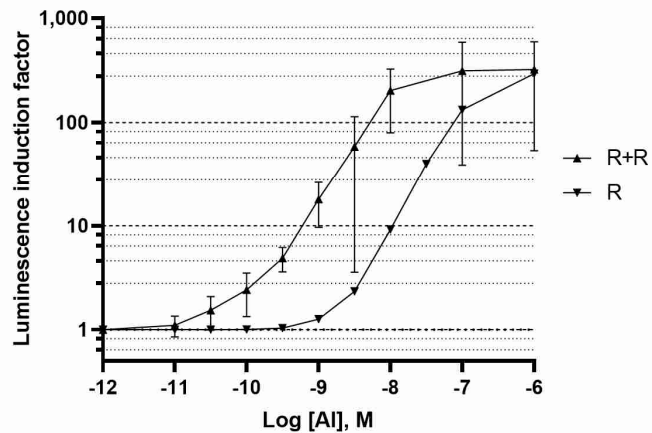**B**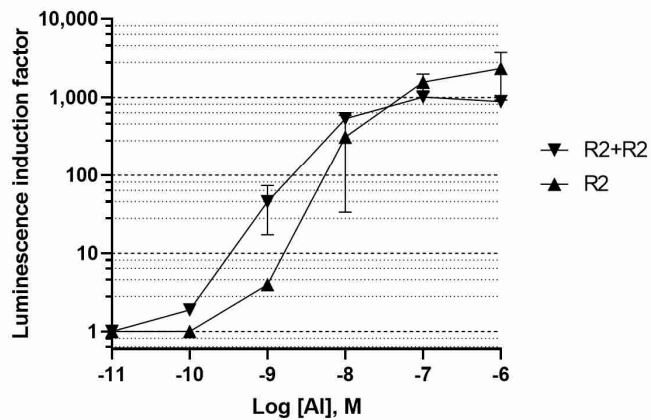**C**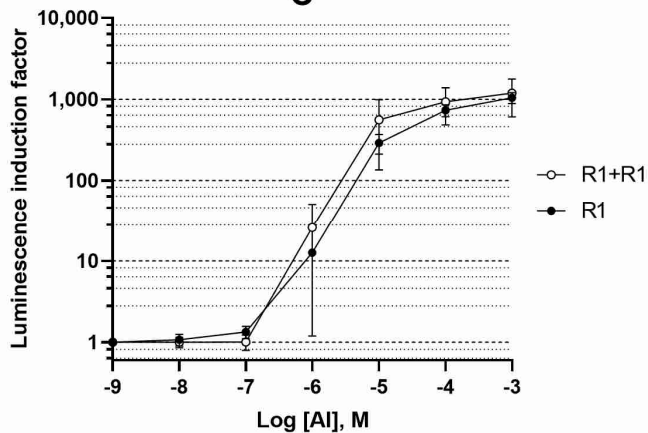

Supplement: s1 [file s1]

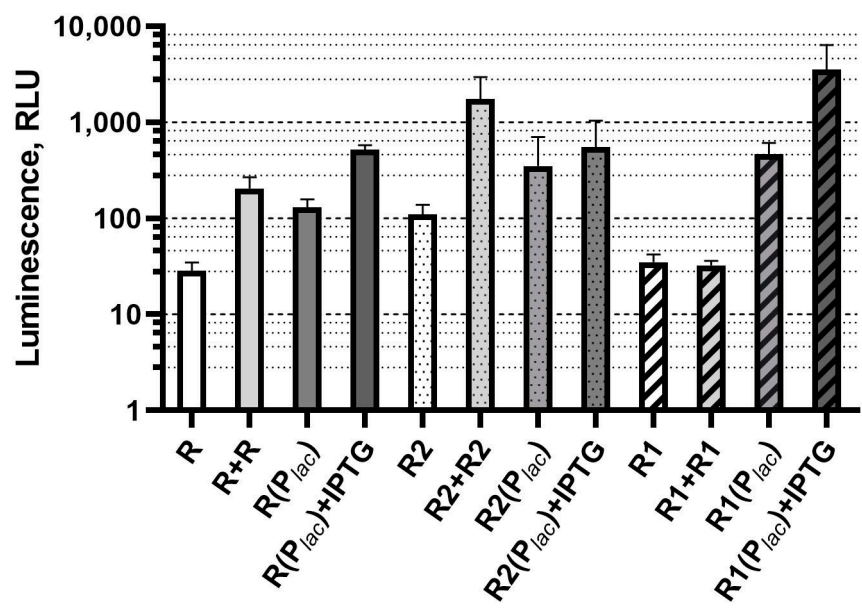

Supplement: s1 [file s1]

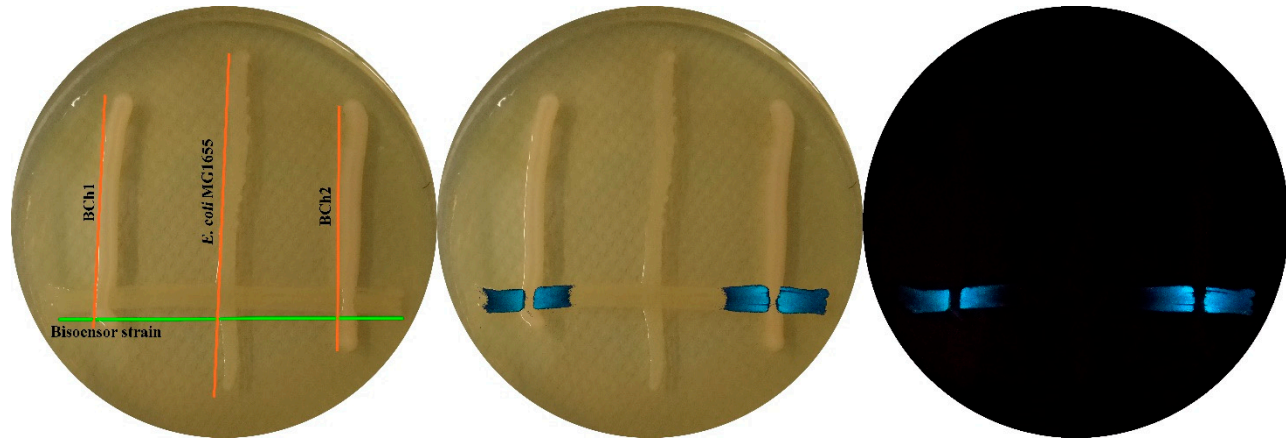

Supplement: s1 [file s1]

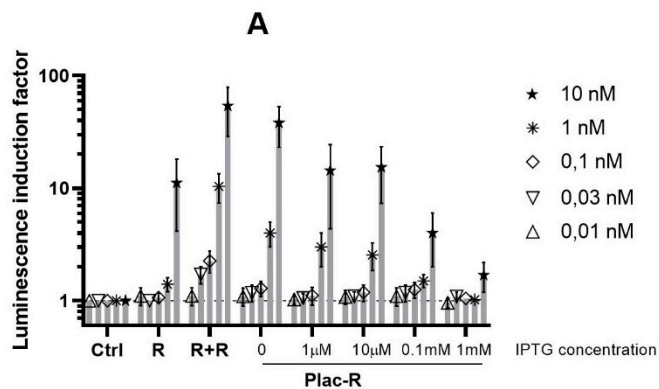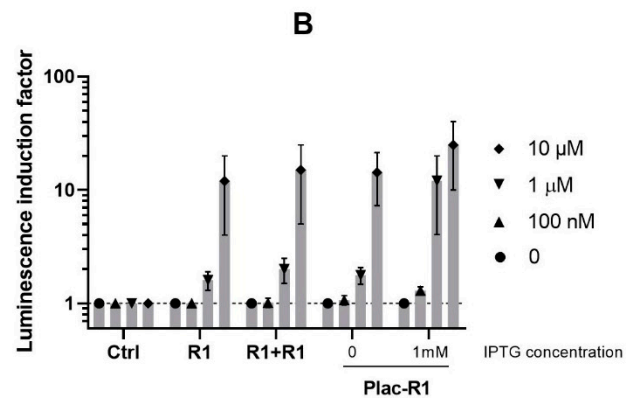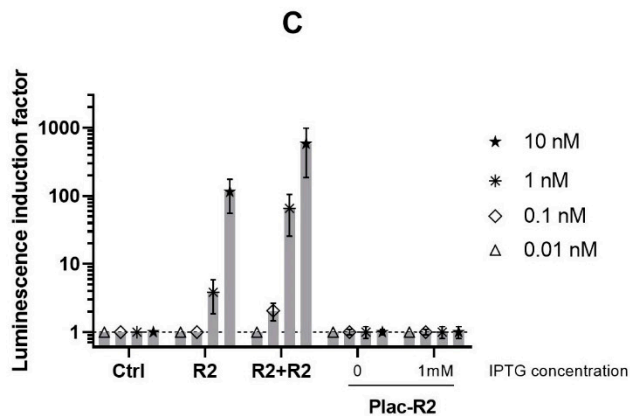

Supplement: s1 [file s1]

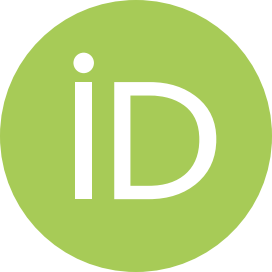

Supplement: s1 [file s1]

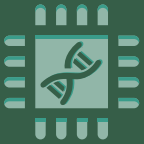

***biosensors***

Supplement: s1 [file s1]

**A**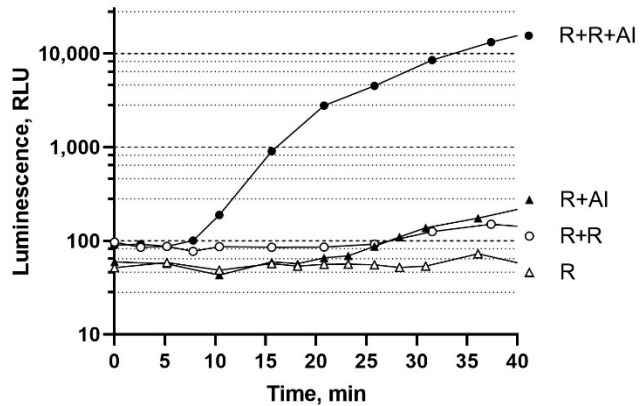**B**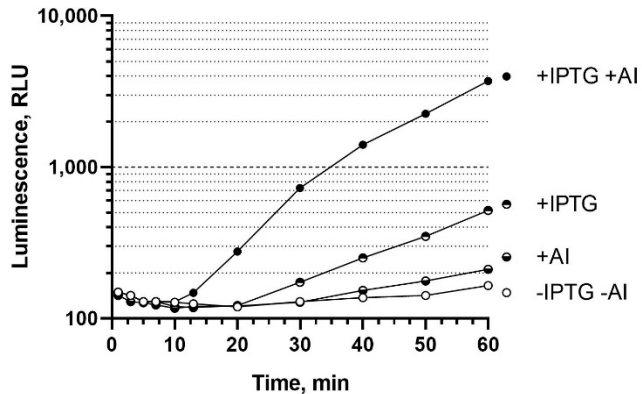

Supplement: s1 [file s1]
